# Supplementary material for: Assessing the Effect of Silicon Supply on Root Sulfur Uptake in S-Fed and S-Deprived Brassica napus L
Source: MDPI journal article supplement (doi:10.3390/plants11121606), 2022-06-18
Supplement: s1 [file s1]

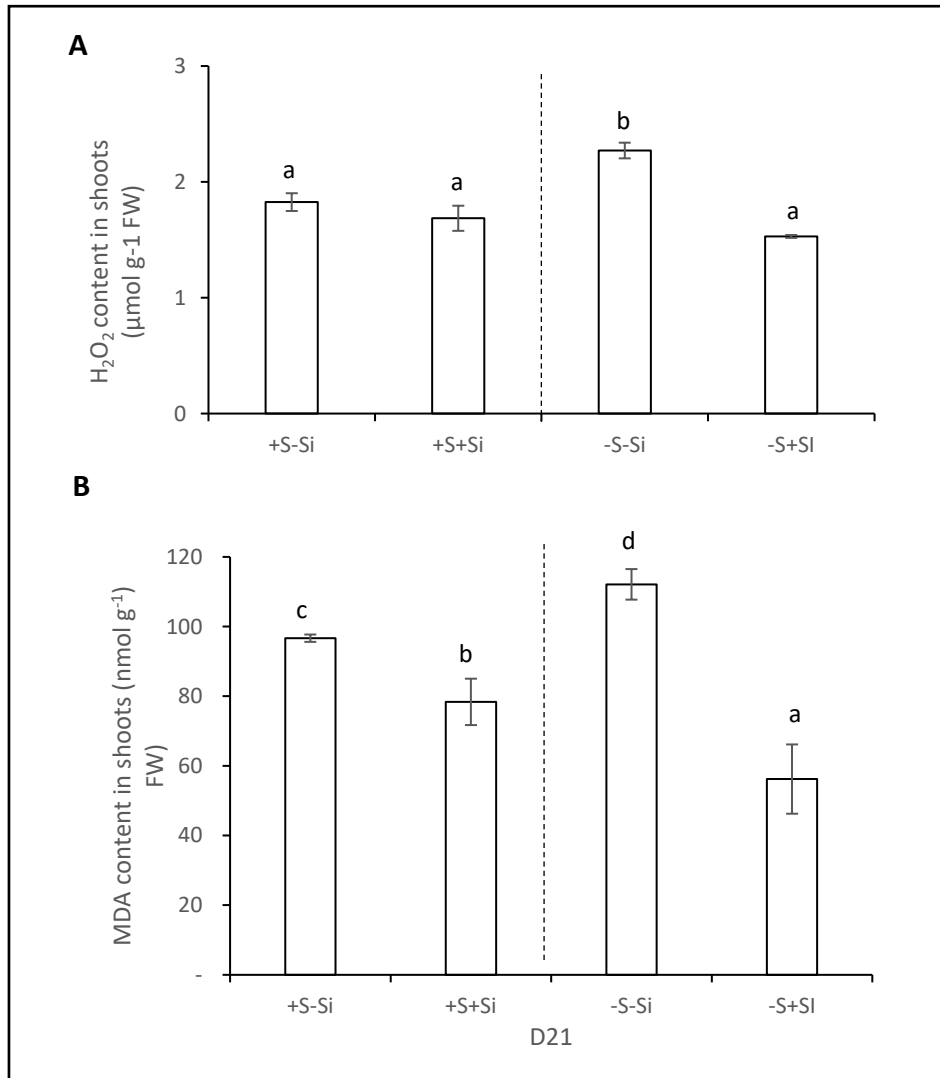

Supplemental data S1: Hydrogen peroxide (H<sub>2</sub>O<sub>2</sub>) and malondialdehyde (MDA) contents in shoots of *Brassica napus* L cultivated in hydroponic conditions for 21 days (D21) with (+S; 500 μM) or without sulfur (–S; 0 μM) concentrations and with (+Si; 1.7 mM) or without silicon (–Si) supply. Data are means ± SE (for n = 4). Different lowercase letters indicate significant difference in the indices ( $p < 0.05$ ). Hydrogen peroxide (H<sub>2</sub>O<sub>2</sub>) and malondialdehyde (MDA) contents were determined according to methods previously described by Haddad et al. [28].
